# Supplementary material for: Neutral and ionic complexes of C60with (ZnOEP)2·BPy coordination dimers
Source: Royal Society of Chemistry journal article supplement (doi:10.1039/b708100f), 2007-12-14
Supplement: b708100f.pdf [file b708100f.pdf]

**Supporting information.**

**Table S1.** IR-spectra of starting compounds.

| ZnOEP | C <sub>60</sub> | (TDAE <sup>+</sup> ·)(C <sub>60</sub> <sup>•-</sup> ) [1] | BPy   | CHCl <sub>3</sub> | C <sub>6</sub> H <sub>4</sub> Cl <sub>2</sub> | C <sub>6</sub> H <sub>6</sub> |
|-------|-----------------|-----------------------------------------------------------|-------|-------------------|-----------------------------------------------|-------------------------------|
| 700m  | 526s            | TDAE <sup>+</sup>                                         | 498w  | 669w              | 657w                                          | 673s                          |
| 728m  | 576m            | 872w                                                      | 600s  | 759s              | 748s                                          | 1035w                         |
| 748m  | 1182m           | 1060m                                                     | 806s  | 1216m             | 1030m                                         | 1479m                         |
| 836s  | 1429s           | 1143w                                                     | 990m  |                   | 1122m                                         |                               |
| 912w  |                 | 1355m                                                     | 1075w |                   | 1453m                                         |                               |
| 955s  |                 | 1396s                                                     | 1098w |                   |                                               |                               |
| 979w  |                 | 1517m                                                     | 1118w |                   |                                               |                               |
| 1015s |                 | C <sub>60</sub> <sup>•-</sup>                             | 1219m |                   |                                               |                               |
| 1056m |                 | 514w 526w                                                 | 1323w |                   |                                               |                               |
| 1108w |                 | 575s                                                      | 1406s |                   |                                               |                               |
| 1146m |                 | 1182w                                                     | 1528w |                   |                                               |                               |
| 1219w |                 | 1389s                                                     | 1590s |                   |                                               |                               |
| 1267m |                 |                                                           | 3044w |                   |                                               |                               |
| 1315w |                 |                                                           |       |                   |                                               |                               |
| 1375m |                 |                                                           |       |                   |                                               |                               |
| 1399m |                 |                                                           |       |                   |                                               |                               |
| 1465s |                 |                                                           |       |                   |                                               |                               |
| 2867m |                 |                                                           |       |                   |                                               |                               |
| 2928m |                 |                                                           |       |                   |                                               |                               |
| 2961m |                 |                                                           |       |                   |                                               |                               |

[1] K. Pokhodnia, J. Papavassiliou, P. Umek, A. Omerzu, D. Mihailovič, *J. Phys. Chem.*, 1999, **110**, 3606.

**Table S2.** IR-spectra of **1** and **2**

| Components | 1                                                                                                                                                                | 2                                                                                                                                                             |
|------------|------------------------------------------------------------------------------------------------------------------------------------------------------------------|---------------------------------------------------------------------------------------------------------------------------------------------------------------|
| ZnOEP      | 699m<br>728w<br>749s<br>838m<br>910w<br>953m<br>979w<br>1013s<br>1054m<br>1108w<br>1145w<br>1266w<br>1314w<br>1374w<br>1388w<br>1462m<br>2861w<br>2924w<br>2959w | 701m<br>732w<br>747s*<br>839s<br>909w<br>952s<br>977w<br>1012s<br>1054m<br>1108w<br>1144w<br>1266w<br>1312w<br>1374w<br>-<br>1462s<br>2857w<br>2922w<br>2954w |
| BPy        | 490w<br>808w<br>979w<br>-<br>1215m*<br>1405m<br>1597m<br>3040w                                                                                                   | 490w<br>806w<br>977w<br>1094w<br>1214m<br>-<br>1607m<br>3038w                                                                                                 |
| TDAE       |                                                                                                                                                                  | 869w<br>1144w<br>1357m<br>1517m<br>2767w                                                                                                                      |
| Fullerene  | 527s<br>-<br>577m<br>1181m<br>1424m                                                                                                                              | 526m<br>544w<br>576s<br>1180w<br>1390s                                                                                                                        |
| Solvent    | CHCl <sub>3</sub><br>669w<br>756s<br>1215m*                                                                                                                      | C <sub>6</sub> H <sub>4</sub> Cl <sub>2</sub><br>747s*<br>C <sub>6</sub> H <sub>6</sub><br>671m<br>1040w<br>1479w                                             |

\*- the bands are coincided.

### EPR signals in 2.

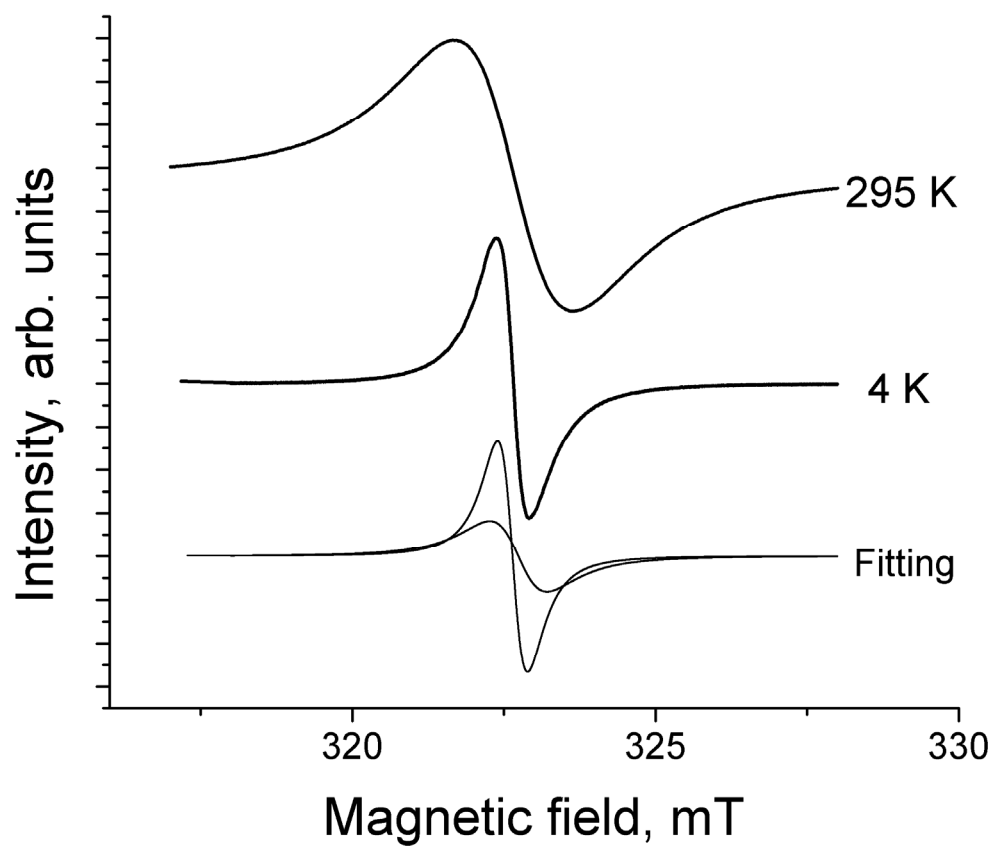

## Temperature dependence of parameters of EPR signal in 2.

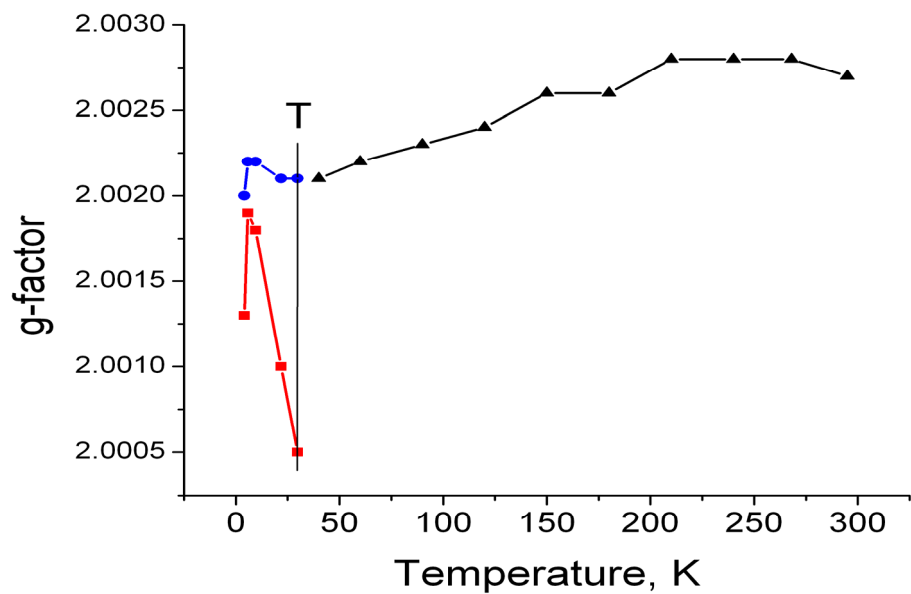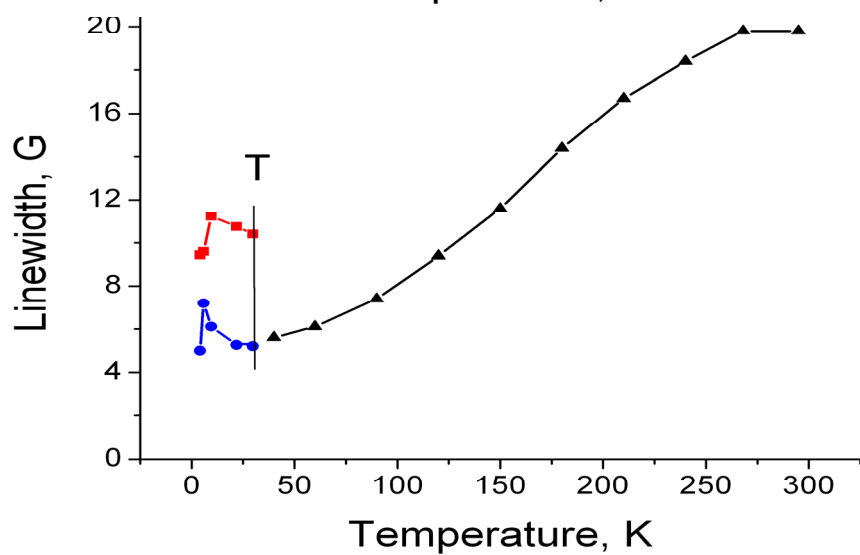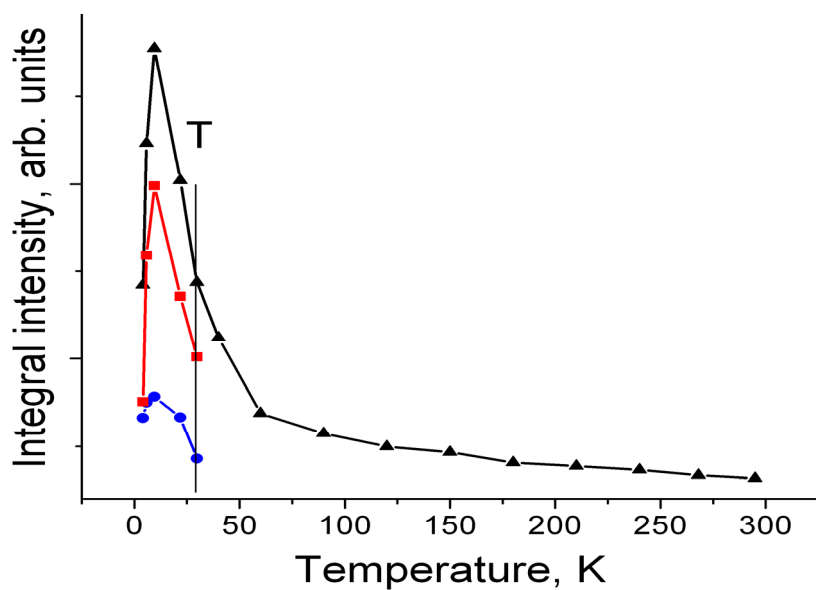

“T” marks the temperature of the splitting of EPR signal in two components.
